# Supplementary material for: Turn-on fluorescent sensor for the detection of cyanide based on a novel dicyanovinyl phenylacetylene
Source: Royal Society of Chemistry journal article supplement (doi:10.1039/c6nj03794a), 2017-01-01
Supplement: c6nj03794a1.pdf [file c6nj03794a1.pdf]

## Supporting Information

### Turn-on Fluorescence Sensor for Detection of Cyanide based a novel dicyanovinyl phenylacetylene

Eknarin Thanayupong,<sup>a,b</sup> Khomson Suttisintong,<sup>c</sup>  
Mongkol Sukawattanasinitt,<sup>d</sup> Nakorn Niamnont<sup>\*a,b</sup>

<sup>a</sup>*Organic Synthesis, electrochemistry&Natural Product Research Unit, Department of Chemistry, Faculty of Science, King Mongkut's University of Technology Thonburi, Bangkok 10140, Thailand.*

<sup>b</sup>*Luminescence&Scintillation Materials Research Unit, Faculty of Science, King Mongkut's University of Technology Thonburi, Bangkok 10140, Thailand.*

<sup>c</sup>*National Nanotechnology Center (NANOTEC), National Science and Technology Development Agency, Thailand Science Park, Khlong Luang, Pathum Thani 12120, Thailand.*

<sup>d</sup>*Department of Chemistry, Faculty of Science and Nanotec-CU Center of Excellence on Food and Agriculture Chulalongkorn University, Bangkok 10330, Thailand.*

*Email: [nakorn.nia@kmutt.ac.th](mailto:nakorn.nia@kmutt.ac.th)*

#### Contents

|                                                                                               | Page |
|-----------------------------------------------------------------------------------------------|------|
| 1. Synthetic procedures of compound <b>2</b> and <b>3</b> .                                   | S2   |
| 2. Suitable condition of solubility in water media of compound <b>3</b> .                     | S5   |
| 3. Absorption spectra of compound <b>3</b> before and after the addition of CN <sup>-</sup> . | S6   |
| 4. The photophysical properties of compound <b>3</b> .                                        | S6   |
| 5. Calibration curve of compound <b>3</b> for CN <sup>-</sup> detection.                      | S7   |
| 6. Fluorescence intensity of compound <b>3</b> under different temperature.                   | S7   |
| 7. CN <sup>-</sup> distillation glassware set.                                                | S8   |

# 1. Spectroscopic data ( $^1\text{H}$ and $^{13}\text{C}$ -NMR) and Mass spectrum.

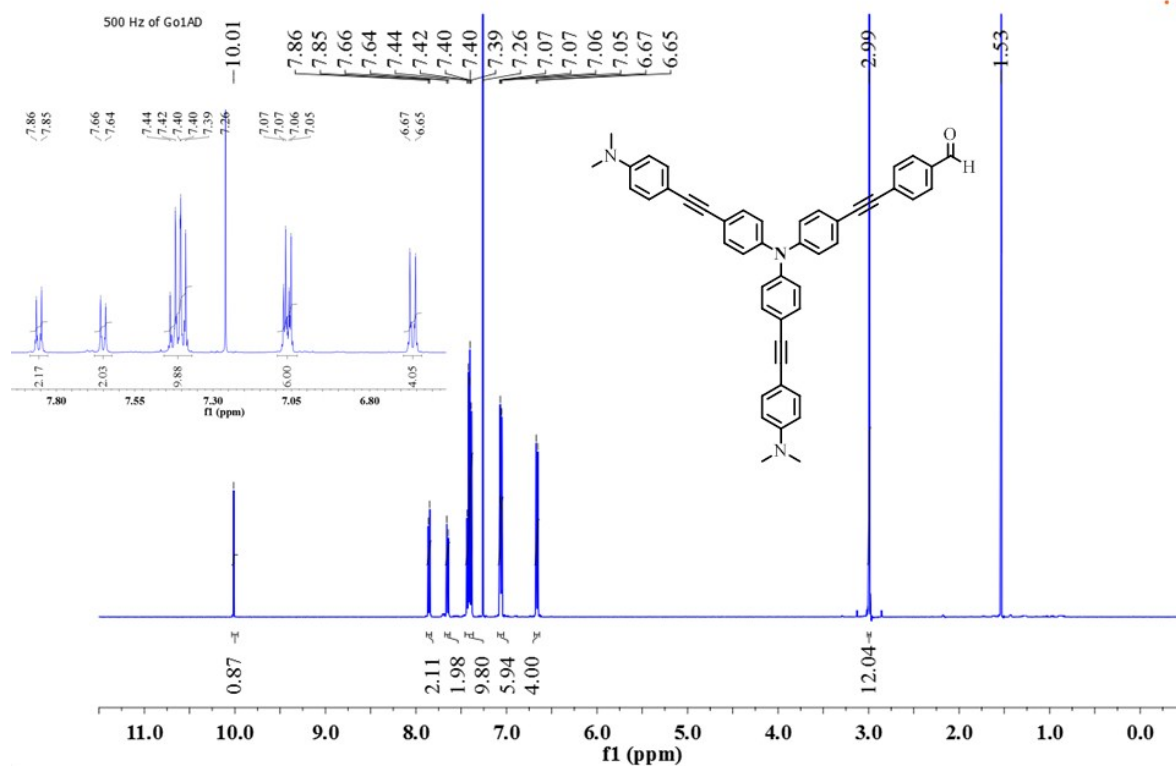

Figure S1.  $^1\text{H}$ -NMR spectrum of **2** in  $\text{CDCl}_3$  (500 MHz).

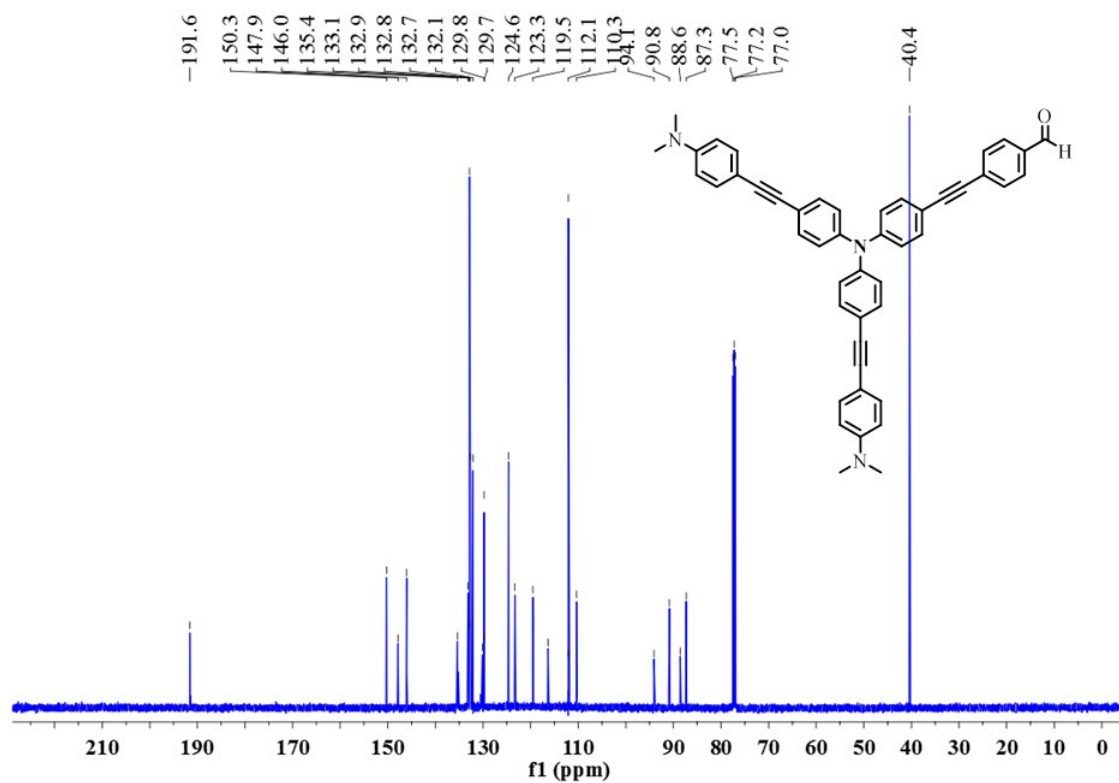

Figure S2.  $^{13}\text{C}$ -NMR spectrum of **2** in  $\text{CDCl}_3$  (125 MHz).

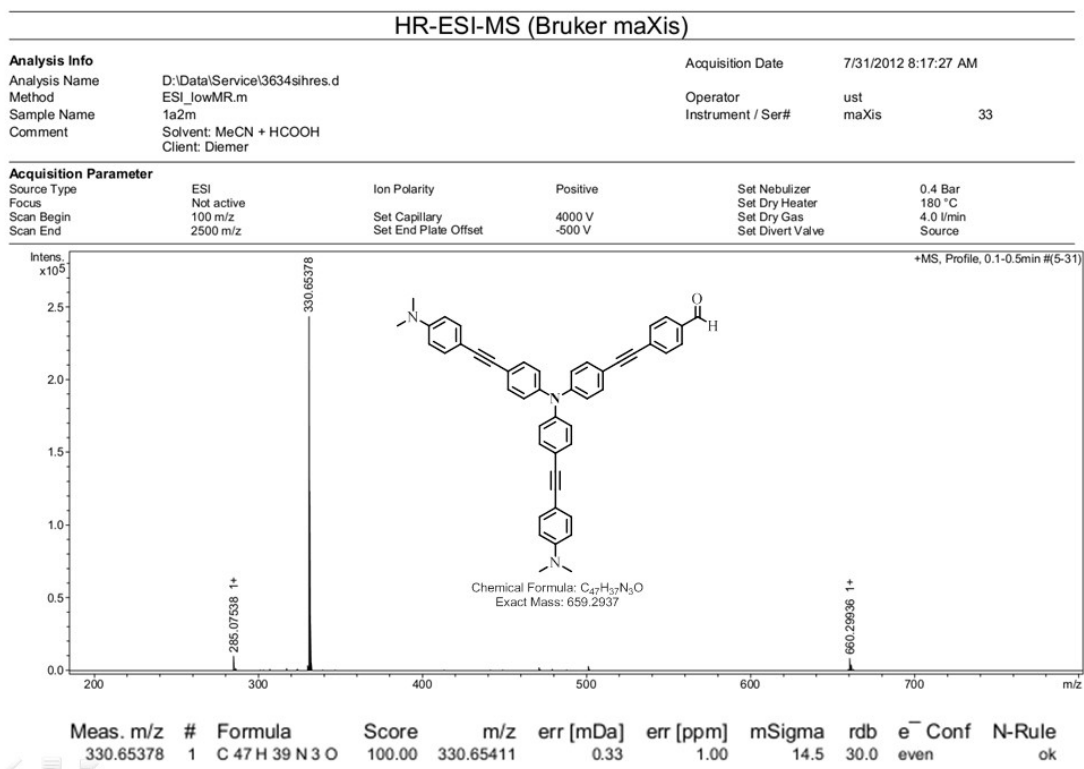

**Figure S3.** HRMS spectrum of **2**.

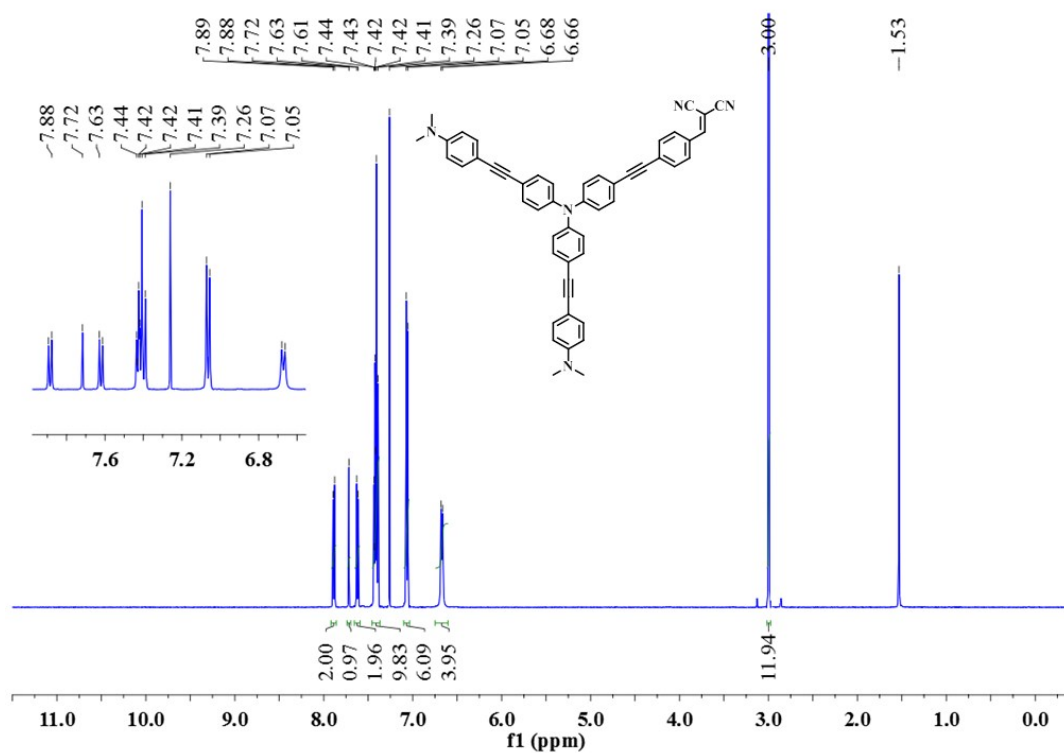

**Figure S4.** <sup>1</sup>H-NMR spectrum of **3** in CDCl<sub>3</sub> (500 MHz).

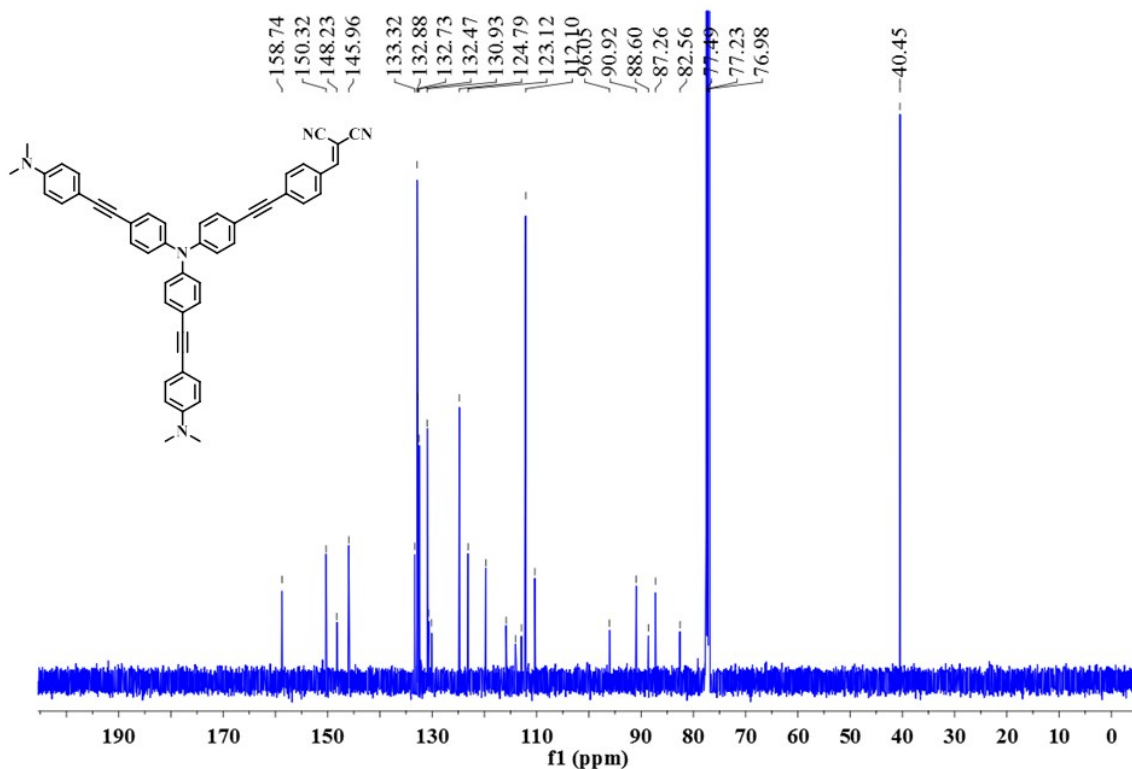

**Figure S5.** <sup>13</sup>C-NMR spectrum of **3** in CDCl<sub>3</sub> (125 MHz).

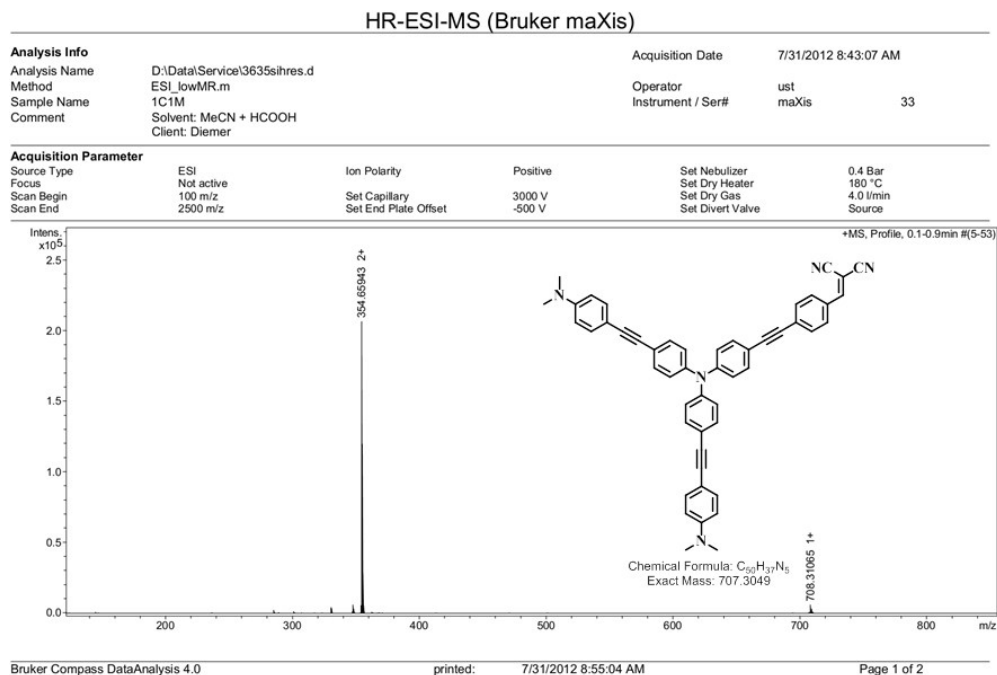

Broker Compass DataAnalysis 4.0 printed: 7/31/2012 8:55:04 AM Page 1 of 2

| Meas. m/z | # | Formula         | Score  | m/z       | err [mDa] | err [ppm] | mSigma | rdb  | e <sup>-</sup> Conf | N-Rule |
|-----------|---|-----------------|--------|-----------|-----------|-----------|--------|------|---------------------|--------|
| 354.65943 | 1 | C 50 H 39 N 5   | 100.00 | 354.65972 | 0.30      | 0.84      | 18.2   | 34.0 | even                | ok     |
|           | 2 | C 49 H 43 N O 4 | 81.89  | 354.65906 | -0.37     | -1.05     | 25.8   | 29.0 | even                | ok     |

**Figure S6.** HRMS spectrum of **3**.

## 2. Suitable condition of compound 3.

### 2.1. Various solvent.

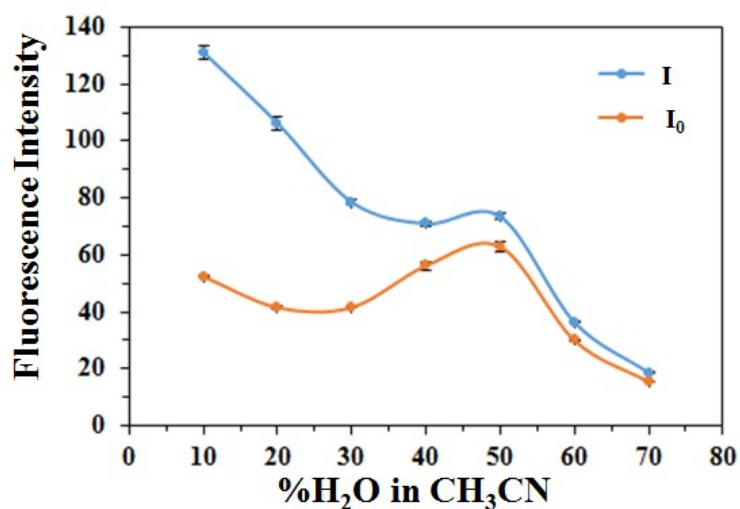

**Figure S7.** Emission spectra of **3** (10  $\mu$ M) by various % H<sub>2</sub>O in CH<sub>3</sub>CN (v/v) before (orange line) and after (blue line) the addition of cyanide ion (100  $\mu$ M) in HEPES buffer pH 7.4 ( $\lambda_{\text{ex}} = 368$  nm and  $\lambda_{\text{em}} = 460$  nm).

### 2.2. Various pH

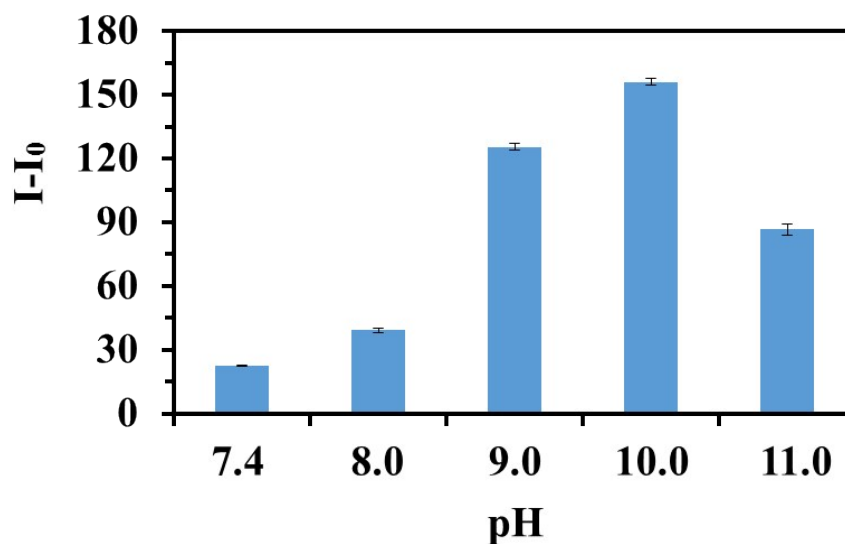

**Figure S8.** Difference of fluorescent emission intensity ( $I-I_0$ ) of **3** (10  $\mu$ M) by various pH (7-12) in 10% (v/v) H<sub>2</sub>O (100 mM HEPES buffer pH 7-12 in CH<sub>3</sub>CN before and after the addition 100  $\mu$ M cyanide ion ( $\lambda_{\text{ex}} = 368$  nm and  $\lambda_{\text{em}} = 460$  nm)).

\* At pH 12.0, precipitate was occurred in the solution.

### 3. Absorption spectra of compound **3** before and after the addition of CN<sup>-</sup>.

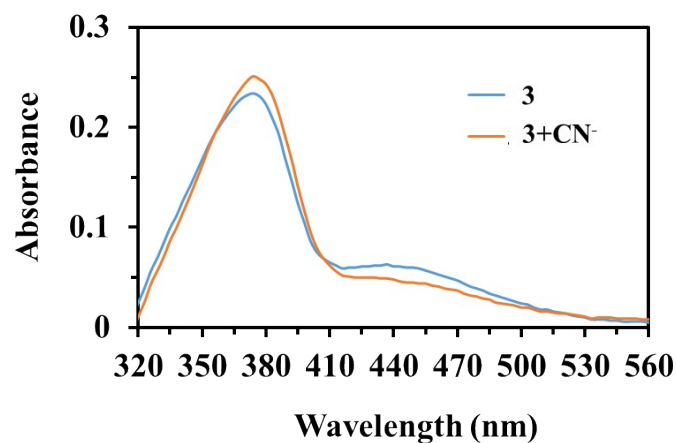

**Figure S9.** Absorption spectra of **3** (10  $\mu\text{M}$ ) in  $\text{CH}_3\text{CN}/100$  mM HEPES buffer pH 10.0 (9:1 v/v) before and after the addition of  $\text{CN}^-$  (10  $\mu\text{M}$ ).

### 4. The photophysical properties of compound **3**.

| Compound                  | Absorption                  |                                                             | Emission                   |                              |
|---------------------------|-----------------------------|-------------------------------------------------------------|----------------------------|------------------------------|
|                           | $\lambda_{\text{max}}$ (nm) | $\epsilon$ ( $\times 10^6 \text{ M}^{-1} \text{ cm}^{-1}$ ) | $\lambda_{\text{em}}$ (nm) | $\Phi_{\text{F}}^{\text{a}}$ |
| <b>3</b>                  | <b>368</b>                  | <b>84,600</b>                                               | <b>460</b>                 | <b>0.008</b>                 |
| <b>3 + CN<sup>-</sup></b> | <b>368</b>                  | <b>86,900</b>                                               | <b>460</b>                 | <b>0.016</b>                 |

Quinine sulfate in 0.1 M  $\text{H}_2\text{SO}_4$  ( $\Phi_{\text{F}} = 0.54$ ) was used as standard.

**Table S1.** Photophysical properties of **3** in 10%  $\text{H}_2\text{O}$  (100 mM HEPES buffer pH 10.0) in  $\text{CH}_3\text{CN}$  before and after the addition of cyanide ion.

5. Calibration curve of compound **3** for CN<sup>-</sup> detection.

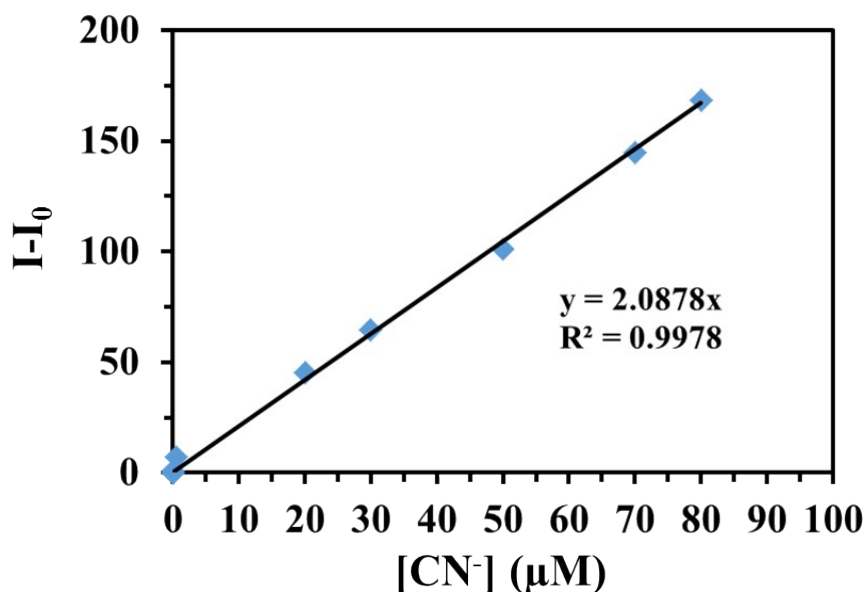

**Figure S10.** Fluorescence emission spectra of **3** (10 μM) in CH<sub>3</sub>CN/ 100 mM HEPES buffer pH 10.0 (9:1 v/v) response to the addition of CN<sup>-</sup> at various concentration 0-80 μM (λ<sub>ex</sub> = 368 nm).

6. Fluorescence intensity of compound **3** under different temperature.

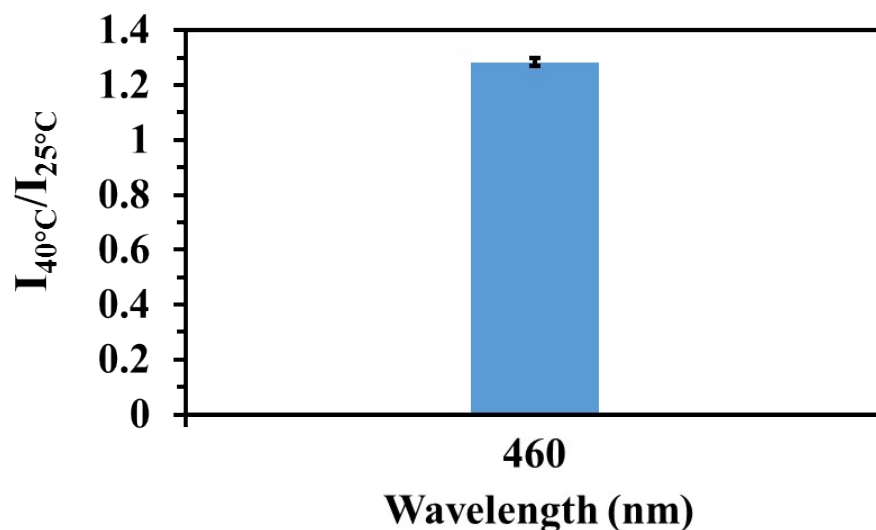

**Figure S11.** Fluorescence intensity of **3** (10 μM) in a mixture of solvents (CH<sub>3</sub>CN : 100 mM HEPES buffer, 9 : 1) after the addition of CN<sup>-</sup> at temperature 25°C and 40°C (λ<sub>ex</sub> = 368 nm and λ<sub>em</sub> = 460 nm).

7. CN<sup>-</sup> distillation set.

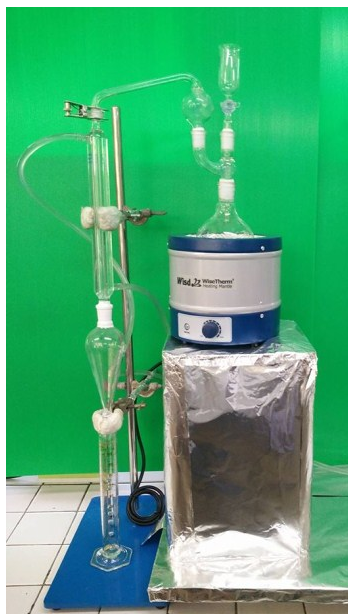

**Figure S12.** CN<sup>-</sup> distillation glassware set by following AOAC 28.1.47.
